# Supplementary material for: Metabolomic Analysis Reveals Domestication-Driven Reshaping of Polyphenolic Antioxidants in Soybean Seeds
Source: MDPI journal article supplement (doi:10.3390/antiox12040912), 2023-04-11
Supplement: s1 [file s1]

**Table S2 The total antioxidant capacities of diverse soybean varieties determined by the FRAP and ABTS assays.**

| Soybean variety      | Species             | Total antioxidant capacity<br>(FRAP, $\mu\text{mol}$ Trolox/g) | Total antioxidant capacity<br>(ABTS, %) |
|----------------------|---------------------|----------------------------------------------------------------|-----------------------------------------|
| Qi huang No.34       | <i>Glycine max</i>  | 4.886                                                          | 27.640                                  |
| Yu dou No.22         | <i>Glycine max</i>  | 3.587                                                          | 21.330                                  |
| Wan dou No.28        | <i>Glycine max</i>  | 4.280                                                          | 29.475                                  |
| Ji dou No.17         | <i>Glycine max</i>  | 3.585                                                          | 25.038                                  |
| Jin dou No.23        | <i>Glycine max</i>  | 4.494                                                          | 35.670                                  |
| Tong shan tian e dan | <i>Glycine max</i>  | 3.422                                                          | 33.673                                  |
| W1                   | <i>Glycine soja</i> | 11.992                                                         | 74.751                                  |
| W11                  | <i>Glycine soja</i> | 4.907                                                          | 52.028                                  |
| W55                  | <i>Glycine soja</i> | 6.886                                                          | 52.464                                  |
| W61                  | <i>Glycine soja</i> | 8.059                                                          | 51.997                                  |
| W71                  | <i>Glycine soja</i> | 8.621                                                          | 54.054                                  |
| W92                  | <i>Glycine soja</i> | 6.384                                                          | 55.444                                  |
