# Supplementary material for: Metabolomic Analysis Reveals Domestication-Driven Reshaping of Polyphenolic Antioxidants in Soybean Seeds
Source: MDPI journal article supplement (doi:10.3390/antiox12040912), 2023-04-11
Supplement: s1 [file s1]

**Table S3 The detailed information on the malonylglucosylated and acetylglucosylated conjugates of polyphenols.**

| Name                               | Exact mass | Formula                                              | Characteristic fragment ions                                                                                                                                                                                                                                                                                                                                                                                                                                                                                                                                                                                    | Neutral loss | Ref  |
|------------------------------------|------------|------------------------------------------------------|-----------------------------------------------------------------------------------------------------------------------------------------------------------------------------------------------------------------------------------------------------------------------------------------------------------------------------------------------------------------------------------------------------------------------------------------------------------------------------------------------------------------------------------------------------------------------------------------------------------------|--------------|------|
| liquiritigenin-malonylglucoside    | 504.1268   | C <sub>24</sub> H <sub>24</sub> O <sub>12</sub>      | [aglycone+H] <sup>+</sup> C <sub>15</sub> H <sub>13</sub> O <sub>4</sub><br><b>257.0814</b> ,<br>[aglycone+H-B ring] <sup>+</sup><br>C <sub>9</sub> H <sub>7</sub> O <sub>3</sub> <b>163.0395</b> ,<br><sup>1,4</sup> B <sup>+</sup> C <sub>9</sub> H <sub>7</sub> O <sub>2</sub> <b>147.0446</b> ,<br><sup>1,3</sup> A <sup>+</sup> C <sub>7</sub> H <sub>5</sub> O <sub>3</sub> <b>137.0239</b>                                                                                                                                                                                                               | 248.0532     | [45] |
| naringenin-malonylglucoside        | 520.1217   | C <sub>24</sub> H <sub>24</sub> O <sub>13</sub>      | [aglycone+H] <sup>+</sup> C <sub>15</sub> H <sub>13</sub> O <sub>5</sub><br><b>273.0763</b> ,<br><sup>1,3</sup> A <sup>+</sup> C <sub>7</sub> H <sub>5</sub> O <sub>4</sub> <b>153.0188</b> ,<br><sup>1,4</sup> B <sup>+</sup> C <sub>9</sub> H <sub>7</sub> O <sub>2</sub> <b>147.0446</b>                                                                                                                                                                                                                                                                                                                     | 248.0532     | [46] |
| pinocembrin-malonylglucoside       | 504.1268   | C <sub>24</sub> H <sub>24</sub> O <sub>12</sub>      | [aglycone+H] <sup>+</sup> C <sub>15</sub> H <sub>13</sub> O <sub>4</sub><br><b>257.0814</b> ,<br><sup>1,3</sup> A <sup>+</sup> C <sub>7</sub> H <sub>5</sub> O <sub>4</sub> <b>153.0188</b> ,<br><sup>1,4</sup> B <sup>+</sup> C <sub>9</sub> H <sub>7</sub> O <b>131.0497</b>                                                                                                                                                                                                                                                                                                                                  | 248.0532     | [47] |
| hesperetin-malonylglucoside        | 550.1323   | C <sub>25</sub> H <sub>26</sub> O <sub>14</sub>      | [aglycone+H] <sup>+</sup> C <sub>16</sub> H <sub>15</sub> O <sub>6</sub><br><b>303.0869</b> ,<br><sup>1,4</sup> B <sup>+</sup> C <sub>10</sub> H <sub>9</sub> O <sub>3</sub> <b>177.0552</b> ,<br><sup>1,3</sup> A <sup>+</sup> C <sub>7</sub> H <sub>5</sub> O <sub>4</sub> <b>153.0188</b> ,<br><sup>1,4</sup> B <sup>+</sup> -CH <sub>2</sub> -H <sub>2</sub> O C <sub>9</sub> H <sub>5</sub> O <sub>2</sub><br><b>145.029</b>                                                                                                                                                                               | 248.0532     | [48] |
| dihydrokaempferol-malonylglucoside | 536.1166   | C <sub>24</sub> H <sub>24</sub> O <sub>14</sub>      | [aglycone-H] <sup>-</sup> C <sub>15</sub> H <sub>11</sub> O <sub>6</sub><br><b>287.0556</b> ,<br>[aglycone-H-H <sub>2</sub> O] <sup>-</sup><br>C <sub>15</sub> H <sub>9</sub> O <sub>5</sub> <b>269.045</b> ,<br>[aglycone-H-CO] <sup>-</sup><br>C <sub>14</sub> H <sub>11</sub> O <sub>5</sub> <b>259.0606</b> ,<br><sup>0,2</sup> A <sup>-</sup> C <sub>8</sub> H <sub>5</sub> O <sub>4</sub> <b>165.0188</b> ,<br><sup>1,3</sup> A <sup>-</sup> C <sub>7</sub> H <sub>3</sub> O <sub>4</sub> <b>151.0031</b> ,<br><sup>1,4</sup> A <sup>-</sup> C <sub>6</sub> H <sub>5</sub> O <sub>3</sub> <b>125.0239</b> | 248.0532     | [49] |
| kaempferol-malonylglucoside        | 534.101    | C <sub>24</sub> H <sub>22</sub> O <sub>14</sub>      | [aglycone+H] <sup>+</sup> C <sub>15</sub> H <sub>11</sub> O <sub>6</sub><br><b>287.0556</b> ,<br><sup>0,2</sup> A <sup>+</sup> C <sub>8</sub> H <sub>5</sub> O <sub>4</sub> <b>165.0188</b> ,<br><sup>1,3</sup> A <sup>+</sup> C <sub>7</sub> H <sub>5</sub> O <sub>4</sub> <b>153.0188</b> ,<br><sup>0,3</sup> A <sup>+</sup> C <sub>7</sub> H <sub>5</sub> O <sub>3</sub> <b>137.0239</b> ,<br><sup>0,2</sup> B <sup>+</sup> C <sub>7</sub> H <sub>5</sub> O <sub>2</sub> <b>121.029</b>                                                                                                                      | 248.0532     | [50] |
| cyanidin-malonylglucoside          | 535.1088   | C <sub>24</sub> H <sub>23</sub> O <sub>14</sub><br>+ | [aglycone] <sup>+</sup> C <sub>15</sub> H <sub>11</sub> O <sub>6</sub><br><b>287.0556</b> ,<br><sup>0,2</sup> A <sup>+</sup> C <sub>8</sub> H <sub>5</sub> O <sub>3</sub> <b>149.0239</b> ,<br><sup>0,2</sup> B <sup>+</sup> C <sub>7</sub> H <sub>5</sub> O <sub>3</sub> <b>137.0239</b> ,                                                                                                                                                                                                                                                                                                                     | 248.0532     | [51] |

| Name                                   | Exact mass | Formula                                   | Characteristic fragment ions                                                                                                                                                                                                                                                                                                                                                                                                                                                                                                                                                                                    | Neutral loss | Ref  |
|----------------------------------------|------------|-------------------------------------------|-----------------------------------------------------------------------------------------------------------------------------------------------------------------------------------------------------------------------------------------------------------------------------------------------------------------------------------------------------------------------------------------------------------------------------------------------------------------------------------------------------------------------------------------------------------------------------------------------------------------|--------------|------|
|                                        |            |                                           | $^{0,3}\text{A}^+ \text{C}_7\text{H}_5\text{O}_2$ <b>121.029</b>                                                                                                                                                                                                                                                                                                                                                                                                                                                                                                                                                |              |      |
| catechin-malonylglucoside              | 538.1323   | $\text{C}_{24}\text{H}_{26}\text{O}_{14}$ | $[\text{aglycone}+\text{H}]^+ \text{C}_{15}\text{H}_{15}\text{O}_6$<br><b>291.0869</b> ,<br>$^{1,4}\text{B}^+ \text{C}_9\text{H}_9\text{O}_3$ <b>165.0552</b> ,<br>$^{1,4}\text{B}^+-\text{H}_2\text{O} \text{C}_9\text{H}_7\text{O}_2$ <b>147.0446</b> ,<br>$^{1,3}\text{A}^+ \text{C}_7\text{H}_7\text{O}_3$ <b>139.0395</b> ,<br>$^{1,2}\text{B}^+ \text{C}_7\text{H}_7\text{O}_2$ <b>123.0446</b>                                                                                                                                                                                                           | 248.0532     | [27] |
| catechin-methyl ether-malonylglucoside | 552.1479   | $\text{C}_{25}\text{H}_{28}\text{O}_{14}$ | $[\text{aglycone}+\text{H}]^+ \text{C}_{16}\text{H}_{17}\text{O}_6$<br><b>305.1025</b> ,<br>$^{1,2}\text{A}^+-\text{H}_2\text{O} \text{C}_8\text{H}_7\text{O}_3$ <b>151.0395</b> ,<br>$^{1,4}\text{B}^+-\text{H}_2\text{O} \text{C}_9\text{H}_7\text{O}_2$ <b>147.0446</b> ,<br>$^{1,3}\text{A}^+ \text{C}_7\text{H}_7\text{O}_3$ <b>139.0395</b> ,<br>$^{1,2}\text{B}^+ \text{C}_8\text{H}_9\text{O}_2$ <b>137.0603</b>                                                                                                                                                                                        | 248.0532     | [27] |
| daidzein-malonylglucoside              | 502.1111   | $\text{C}_{24}\text{H}_{22}\text{O}_{12}$ | $[\text{aglycone}+\text{H}]^+ \text{C}_{15}\text{H}_{11}\text{O}_4$<br><b>255.0657</b> ,<br>$[\text{aglycone}+\text{H}-\text{CO}]^+$<br>$\text{C}_{14}\text{H}_{11}\text{O}_3$ <b>227.0708</b> ,<br>$[\text{aglycone}+\text{H}-\text{CO}-\text{CO}]^+$<br>$\text{C}_{13}\text{H}_{11}\text{O}_2$ <b>199.0759</b> ,<br>$^{1,3}\text{A}^+ \text{C}_7\text{H}_5\text{O}_3$ <b>137.0239</b>                                                                                                                                                                                                                         | 248.0532     | [52] |
| formononetin-malonylglucoside          | 516.1268   | $\text{C}_{25}\text{H}_{24}\text{O}_{12}$ | $[\text{aglycone}+\text{H}]^+ \text{C}_{16}\text{H}_{13}\text{O}_4$<br><b>269.0814</b> ,<br>$[\text{aglycone}+\text{H}-\text{CH}_3]^+$<br>$\text{C}_{15}\text{H}_{10}\text{O}_4$ <b>254.0579</b> ,<br>$[\text{aglycone}+\text{H}-\text{CH}_4]^+$<br>$\text{C}_{15}\text{H}_9\text{O}_4$ <b>253.0501</b> ,<br>$[\text{aglycone}+\text{H}-\text{CH}_4\text{O}]^+$<br>$\text{C}_{15}\text{H}_9\text{O}_3$ <b>237.0552</b> ,<br>$[\text{aglycone}+\text{H}-\text{CO}-\text{CO}]^+$<br>$\text{C}_{14}\text{H}_{13}\text{O}_2$ <b>213.0916</b> ,<br>$^{1,3}\text{A}^+ \text{C}_7\text{H}_5\text{O}_3$ <b>137.0239</b> | 248.0532     | [52] |
| genistein-malonylglucoside             | 518.106    | $\text{C}_{24}\text{H}_{22}\text{O}_{13}$ | $[\text{aglycone}+\text{H}]^+ \text{C}_{15}\text{H}_{11}\text{O}_5$<br><b>271.0606</b> ,<br>$[\text{aglycone}+\text{H}-\text{CO}]^+$<br>$\text{C}_{14}\text{H}_{11}\text{O}_4$ <b>243.065</b> ,<br>$[\text{aglycone}+\text{H}-\text{CO}-\text{CO}]^+$<br>$\text{C}_{13}\text{H}_{11}\text{O}_3$ <b>215.0708</b> ,<br>$^{1,3}\text{A}^+ \text{C}_7\text{H}_5\text{O}_4$ <b>153.0188</b>                                                                                                                                                                                                                          | 248.0532     | [52] |
| biochanin A-malonylglucoside           | 532.1217   | $\text{C}_{25}\text{H}_{24}\text{O}_{13}$ | $[\text{aglycone}+\text{H}]^+ \text{C}_{16}\text{H}_{13}\text{O}_5$<br><b>285.0763</b> ,<br>$[\text{aglycone}+\text{H}-\text{CH}_3]^+$<br>$\text{C}_{15}\text{H}_{10}\text{O}_5$ <b>270.0528</b> ,                                                                                                                                                                                                                                                                                                                                                                                                              | 248.0532     | [52] |

| Name                                 | Exact mass | Formula                                         | Characteristic fragment ions                                                                                                                                                                                                                                                                                                                                                                                                                                                                                                                                                                                                                                                                                                                                             | Neutral loss          | Ref  |
|--------------------------------------|------------|-------------------------------------------------|--------------------------------------------------------------------------------------------------------------------------------------------------------------------------------------------------------------------------------------------------------------------------------------------------------------------------------------------------------------------------------------------------------------------------------------------------------------------------------------------------------------------------------------------------------------------------------------------------------------------------------------------------------------------------------------------------------------------------------------------------------------------------|-----------------------|------|
|                                      |            |                                                 | [aglycone+H-CH <sub>4</sub> ] <sup>+</sup><br><i>C</i> <sub>15</sub> <i>H</i> <sub>9</sub> <i>O</i> <sub>5</sub> <b>269.045</b> ,<br>[aglycone+H-CH <sub>4</sub> O] <sup>+</sup><br><i>C</i> <sub>15</sub> <i>H</i> <sub>9</sub> <i>O</i> <sub>4</sub> <b>253.0501</b> ,<br>[aglycone+H-CO-CO] <sup>+</sup><br><i>C</i> <sub>14</sub> <i>H</i> <sub>13</sub> <i>O</i> <sub>3</sub> <b>229.0865</b> ,<br><sup>1,3</sup> A <sup>+</sup> <i>C</i> <sub>7</sub> <i>H</i> <sub>5</sub> <i>O</i> <sub>4</sub> <b>153.0188</b>                                                                                                                                                                                                                                                  |                       |      |
| glycitein-malonylglucoside           | 532.1217   | C <sub>25</sub> H <sub>24</sub> O <sub>13</sub> | [aglycone+H] <sup>+</sup> <i>C</i> <sub>16</sub> <i>H</i> <sub>13</sub> <i>O</i> <sub>5</sub> <b>285.0763</b> ,<br>[aglycone+H-CH <sub>3</sub> ] <sup>+</sup><br><i>C</i> <sub>15</sub> <i>H</i> <sub>10</sub> <i>O</i> <sub>5</sub> <b>270.0528</b> ,<br>[aglycone+H-CO] <sup>+</sup><br><i>C</i> <sub>15</sub> <i>H</i> <sub>13</sub> <i>O</i> <sub>4</sub> <b>257.0814</b> ,<br>[aglycone+H-CH <sub>3</sub> -CO] <sup>+</sup><br><i>C</i> <sub>14</sub> <i>H</i> <sub>10</sub> <i>O</i> <sub>4</sub> <b>242.0579</b> ,<br>[aglycone+H-CO-CO] <sup>+</sup><br><i>C</i> <sub>14</sub> <i>H</i> <sub>13</sub> <i>O</i> <sub>3</sub> <b>229.0865</b> ,<br><sup>1,3</sup> A <sup>+</sup> <i>C</i> <sub>8</sub> <i>H</i> <sub>7</sub> <i>O</i> <sub>4</sub> <b>167.0344</b> | 248.0532              | [52] |
| daidzein-dimalonylglucoside          | 588.1115   | C <sub>27</sub> H <sub>24</sub> O <sub>15</sub> | [aglycone+H] <sup>+</sup> <i>C</i> <sub>15</sub> <i>H</i> <sub>11</sub> <i>O</i> <sub>4</sub> <b>255.0657</b> ,<br>[aglycone+H-CO] <sup>+</sup><br><i>C</i> <sub>14</sub> <i>H</i> <sub>11</sub> <i>O</i> <sub>3</sub> <b>227.0708</b> ,<br>[aglycone+H-CO-CO] <sup>+</sup><br><i>C</i> <sub>13</sub> <i>H</i> <sub>11</sub> <i>O</i> <sub>2</sub> <b>199.0759</b> ,<br><sup>1,3</sup> A <sup>+</sup> <i>C</i> <sub>7</sub> <i>H</i> <sub>5</sub> <i>O</i> <sub>3</sub> <b>137.0239</b>                                                                                                                                                                                                                                                                                  | 334.0536              | [52] |
| genistein-dimalonylglucoside         | 604.1064   | C <sub>27</sub> H <sub>24</sub> O <sub>16</sub> | [aglycone+H] <sup>+</sup> <i>C</i> <sub>15</sub> <i>H</i> <sub>11</sub> <i>O</i> <sub>5</sub> <b>271.0606</b> ,<br>[aglycone+H-CO] <sup>+</sup><br><i>C</i> <sub>14</sub> <i>H</i> <sub>11</sub> <i>O</i> <sub>4</sub> <b>243.065</b> ,<br>[aglycone+H-CO-CO] <sup>+</sup><br><i>C</i> <sub>13</sub> <i>H</i> <sub>11</sub> <i>O</i> <sub>3</sub> <b>215.0708</b> ,<br><sup>1,3</sup> A <sup>+</sup> <i>C</i> <sub>7</sub> <i>H</i> <sub>5</sub> <i>O</i> <sub>4</sub> <b>153.0188</b>                                                                                                                                                                                                                                                                                   | 334.0536              | [52] |
| daidzein-glucoside-malonylglucoside  | 664.1639   | C <sub>30</sub> H <sub>32</sub> O <sub>17</sub> | [aglycone+H] <sup>+</sup> <i>C</i> <sub>15</sub> <i>H</i> <sub>11</sub> <i>O</i> <sub>4</sub> <b>255.0657</b> ,<br>[aglycone+H-CO] <sup>+</sup><br><i>C</i> <sub>14</sub> <i>H</i> <sub>11</sub> <i>O</i> <sub>3</sub> <b>227.0708</b> ,<br>[aglycone+H-CO-CO] <sup>+</sup><br><i>C</i> <sub>13</sub> <i>H</i> <sub>11</sub> <i>O</i> <sub>2</sub> <b>199.0759</b> ,<br><sup>1,3</sup> A <sup>+</sup> <i>C</i> <sub>7</sub> <i>H</i> <sub>5</sub> <i>O</i> <sub>3</sub> <b>137.0239</b>                                                                                                                                                                                                                                                                                  | 248.0532+<br>162.0528 | [52] |
| genistein-glucoside-malonylglucoside | 680.1589   | C <sub>30</sub> H <sub>32</sub> O <sub>18</sub> | [aglycone+H] <sup>+</sup> <i>C</i> <sub>15</sub> <i>H</i> <sub>11</sub> <i>O</i> <sub>5</sub> <b>271.0606</b> ,<br>[aglycone+H-CO] <sup>+</sup>                                                                                                                                                                                                                                                                                                                                                                                                                                                                                                                                                                                                                          | 248.0532+<br>162.0528 | [52] |

| Name                                        | Exact mass | Formula                                         | Characteristic fragment ions                                                                                                                                                                                                                                                | Neutral loss          | Ref  |
|---------------------------------------------|------------|-------------------------------------------------|-----------------------------------------------------------------------------------------------------------------------------------------------------------------------------------------------------------------------------------------------------------------------------|-----------------------|------|
|                                             |            |                                                 | $C_{14}H_{11}O_4$ <b>243.065</b> ,<br>[aglycone+H–CO–CO] <sup>+</sup><br>$C_{13}H_{11}O_3$ <b>215.0708</b> ,<br><sup>1,3</sup> A <sup>+</sup> $C_7H_5O_4$ <b>153.0188</b>                                                                                                   |                       |      |
| genistein-malonylglucoside-pentoside        | 650.1483   | C <sub>29</sub> H <sub>30</sub> O <sub>17</sub> | [aglycone+H] <sup>+</sup> $C_{15}H_{11}O_5$ <b>271.0606</b> ,<br>[aglycone+H–CO] <sup>+</sup><br>$C_{14}H_{11}O_4$ <b>243.065</b> ,<br>[aglycone+H–CO–CO] <sup>+</sup><br>$C_{13}H_{11}O_3$ <b>215.0708</b> ,<br><sup>1,3</sup> A <sup>+</sup> $C_7H_5O_4$ <b>153.0188</b>  | 132.0423+<br>248.0532 | [52] |
| daidzein-malonylglucoside-malonylglucoside  | 750.1643   | C <sub>33</sub> H <sub>34</sub> O <sub>20</sub> | [aglycone+H] <sup>+</sup> $C_{15}H_{11}O_4$ <b>255.0657</b> ,<br>[aglycone+H–CO] <sup>+</sup><br>$C_{14}H_{11}O_3$ <b>227.0708</b> ,<br>[aglycone+H–CO–CO] <sup>+</sup><br>$C_{13}H_{11}O_2$ <b>199.0759</b> ,<br><sup>1,3</sup> A <sup>+</sup> $C_7H_5O_3$ <b>137.0239</b> | 248.0532+<br>248.0532 | [52] |
| genistein-malonylglucoside-malonylglucoside | 766.1593   | C <sub>33</sub> H <sub>34</sub> O <sub>21</sub> | [aglycone+H] <sup>+</sup> $C_{15}H_{11}O_5$ <b>271.0606</b> ,<br>[aglycone+H–CO] <sup>+</sup><br>$C_{14}H_{11}O_4$ <b>243.065</b> ,<br>[aglycone+H–CO–CO] <sup>+</sup><br>$C_{13}H_{11}O_3$ <b>215.0708</b> ,<br><sup>1,3</sup> A <sup>+</sup> $C_7H_5O_4$ <b>153.0188</b>  | 248.0532+<br>248.0532 | [52] |
| naringenin-acetylglucoside                  | 476.1319   | C <sub>23</sub> H <sub>24</sub> O <sub>11</sub> | [aglycone+H] <sup>+</sup> $C_{15}H_{13}O_5$ <b>273.0763</b> ,<br><sup>1,3</sup> A <sup>+</sup> $C_7H_5O_4$ <b>153.0188</b> ,<br><sup>1,4</sup> B <sup>+</sup> $C_9H_7O_2$ <b>147.0446</b>                                                                                   | 204.0634              | [46] |
| liquiritigenin-acetylglucoside              | 460.1369   | C <sub>23</sub> H <sub>24</sub> O <sub>10</sub> | [aglycone–H] <sup>–</sup> $C_{15}H_{11}O_4$ <b>255.0657</b> ,<br><sup>1,3</sup> A <sup>–</sup> $C_7H_3O_3$ <b>135.0082</b> ,<br><sup>1,3</sup> B <sup>–</sup> $C_8H_7O$ <b>119.0497</b>                                                                                     | 204.0634              | [45] |
| hesperetin-acetylglucoside                  | 506.1424   | C <sub>24</sub> H <sub>26</sub> O <sub>12</sub> | [aglycone–H] <sup>–</sup> $C_{16}H_{13}O_6$ <b>301.0712</b> ,<br><sup>1,3</sup> A <sup>–</sup> $C_7H_3O_4$ <b>151.0031</b> ,<br><sup>1,3</sup> B <sup>–</sup> $C_9H_9O_2$ <b>149.0603</b> ,<br><sup>1,3</sup> B <sup>–</sup> –CH <sub>3</sub> $C_8H_6O_2$ <b>134.0368</b>   | 204.0634              | [48] |
| kaempferol-acetylglucoside                  | 490.1111   | C <sub>23</sub> H <sub>22</sub> O <sub>12</sub> | [aglycone+H] <sup>+</sup> $C_{15}H_{11}O_6$ <b>287.0556</b> ,<br><sup>0,2</sup> A <sup>+</sup> $C_8H_5O_4$ <b>165.0188</b> ,<br><sup>1,3</sup> A <sup>+</sup> $C_7H_5O_4$ <b>153.0188</b> ,                                                                                 | 204.0634              | [50] |

| Name                         | Exact mass | Formula                                   | Characteristic fragment ions                                                                                                                                                                                                                                                                                                                                                                                                                                                                                                              | Neutral loss | Ref  |
|------------------------------|------------|-------------------------------------------|-------------------------------------------------------------------------------------------------------------------------------------------------------------------------------------------------------------------------------------------------------------------------------------------------------------------------------------------------------------------------------------------------------------------------------------------------------------------------------------------------------------------------------------------|--------------|------|
|                              |            |                                           | $^{0,3}\text{A}^+ \text{C}_7\text{H}_5\text{O}_3$ <b>137.0239</b> ,<br>$^{0,2}\text{B}^+ \text{C}_7\text{H}_5\text{O}_2$ <b>121.029</b>                                                                                                                                                                                                                                                                                                                                                                                                   |              |      |
| catechin-acetylglucoside     | 494.1424   | $\text{C}_{23}\text{H}_{26}\text{O}_{12}$ | $[\text{aglycone-H}]^- \text{C}_{15}\text{H}_{13}\text{O}_6$<br><b>289.0712</b> ,<br>$^{1,2}\text{A}^- \text{H}_2\text{O} \text{C}_8\text{H}_5\text{O}_3$ <b>149.0239</b> ,<br>$^{1,3}\text{A}^- \text{C}_7\text{H}_5\text{O}_3$ <b>137.0239</b> ,<br>$^{1,2}\text{B}^- \text{C}_7\text{H}_5\text{O}_2$ <b>121.029</b>                                                                                                                                                                                                                    | 204.0634     | [27] |
| daidzein-acetylglucoside     | 458.1213   | $\text{C}_{23}\text{H}_{22}\text{O}_{10}$ | $[\text{aglycone+H}]^+ \text{C}_{15}\text{H}_{11}\text{O}_4$<br><b>255.0657</b> ,<br>$[\text{aglycone+H-CO}]^+$<br>$\text{C}_{14}\text{H}_{11}\text{O}_3$ <b>227.0708</b> ,<br>$[\text{aglycone+H-CO-CO}]^+$<br>$\text{C}_{13}\text{H}_{11}\text{O}_2$ <b>199.0759</b> ,<br>$^{1,3}\text{A}^+ \text{C}_7\text{H}_5\text{O}_3$ <b>137.0239</b>                                                                                                                                                                                             | 204.0634     | [52] |
| formononetin-acetylglucoside | 472.1369   | $\text{C}_{24}\text{H}_{24}\text{O}_{10}$ | $[\text{aglycone+H}]^+ \text{C}_{16}\text{H}_{13}\text{O}_4$<br><b>269.0814</b> ,<br>$[\text{aglycone+H-CH}_3]^+$<br>$\text{C}_{15}\text{H}_{10}\text{O}_4$ <b>254.0579</b> ,<br>$[\text{aglycone+H-CH}_4]^+$<br>$\text{C}_{15}\text{H}_9\text{O}_4$ <b>253.0501</b> ,<br>$[\text{aglycone+H-CH}_4\text{O}]^+$<br>$\text{C}_{15}\text{H}_9\text{O}_3$ <b>237.0552</b> ,<br>$[\text{aglycone+H-CO-CO}]^+$<br>$\text{C}_{14}\text{H}_{13}\text{O}_2$ <b>213.0916</b> ,<br>$^{1,3}\text{A}^+ \text{C}_7\text{H}_5\text{O}_3$ <b>137.0239</b> | 204.0634     | [52] |
| genistein-acetylglucoside    | 474.1162   | $\text{C}_{23}\text{H}_{22}\text{O}_{11}$ | $[\text{aglycone+H}]^+ \text{C}_{15}\text{H}_{11}\text{O}_5$<br><b>271.0606</b> ,<br>$[\text{aglycone+H-CO}]^+$<br>$\text{C}_{14}\text{H}_{11}\text{O}_4$ <b>243.065</b> ,<br>$[\text{aglycone+H-CO-CO}]^+$<br>$\text{C}_{13}\text{H}_{11}\text{O}_3$ <b>215.0708</b> ,<br>$^{1,3}\text{A}^+ \text{C}_7\text{H}_5\text{O}_4$ <b>153.0188</b>                                                                                                                                                                                              | 204.0634     | [52] |
| glycitein-acetylglucoside    | 488.1319   | $\text{C}_{24}\text{H}_{24}\text{O}_{11}$ | $[\text{aglycone+H}]^+ \text{C}_{16}\text{H}_{13}\text{O}_5$<br><b>285.0763</b> ,<br>$[\text{aglycone+H-CH}_3]^+$<br>$\text{C}_{15}\text{H}_{10}\text{O}_5$ <b>270.0528</b> ,<br>$[\text{aglycone+H-CO}]^+$<br>$\text{C}_{15}\text{H}_{13}\text{O}_4$ <b>257.0814</b> ,<br>$[\text{aglycone+H-CH}_3\text{-CO}]^+$<br>$\text{C}_{14}\text{H}_{10}\text{O}_4$ <b>242.0579</b> ,<br>$[\text{aglycone+H-CO-CO}]^+$<br>$\text{C}_{14}\text{H}_{13}\text{O}_3$ <b>229.0865</b> ,                                                                | 204.0634     | [52] |

| Name                              | Exact mass | Formula                                   | Characteristic fragment ions                                                                                                                                                                                                                                                                                                                                                            | Neutral loss | Ref  |
|-----------------------------------|------------|-------------------------------------------|-----------------------------------------------------------------------------------------------------------------------------------------------------------------------------------------------------------------------------------------------------------------------------------------------------------------------------------------------------------------------------------------|--------------|------|
|                                   |            |                                           | $^{1,3}\text{A}^+ \text{C}_8\text{H}_7\text{O}_4$ <b>167.0344</b>                                                                                                                                                                                                                                                                                                                       |              |      |
| daidzein-diacetylramnoside        | 484.1369   | $\text{C}_{25}\text{H}_{24}\text{O}_{10}$ | $[\text{aglycone}+\text{H}]^+ \text{C}_{15}\text{H}_{11}\text{O}_4$<br><b>255.0657</b> ,<br>$[\text{aglycone}+\text{H}-\text{CO}]^+$<br>$\text{C}_{14}\text{H}_{11}\text{O}_3$ <b>227.0708</b> ,<br>$[\text{aglycone}+\text{H}-\text{CO}-\text{CO}]^+$<br>$\text{C}_{13}\text{H}_{11}\text{O}_2$ <b>199.0759</b> ,<br>$^{1,3}\text{A}^+ \text{C}_7\text{H}_5\text{O}_3$ <b>137.0239</b> | 230.079      | [52] |
| genistein-diacetylramnoside       | 500.1319   | $\text{C}_{25}\text{H}_{24}\text{O}_{11}$ | $[\text{aglycone}+\text{H}]^+ \text{C}_{15}\text{H}_{11}\text{O}_5$<br><b>271.0606</b> ,<br>$[\text{aglycone}+\text{H}-\text{CO}]^+$<br>$\text{C}_{14}\text{H}_{11}\text{O}_4$ <b>243.065</b> ,<br>$[\text{aglycone}+\text{H}-\text{CO}-\text{CO}]^+$<br>$\text{C}_{13}\text{H}_{11}\text{O}_3$ <b>215.0708</b> ,<br>$^{1,3}\text{A}^+ \text{C}_7\text{H}_5\text{O}_4$ <b>153.0188</b>  | 230.079      | [52] |
| daidzein-acetyl-malonylglucoside  | 544.1217   | $\text{C}_{26}\text{H}_{24}\text{O}_{13}$ | $[\text{aglycone}+\text{H}]^+ \text{C}_{15}\text{H}_{11}\text{O}_4$<br><b>255.0657</b> ,<br>$[\text{aglycone}+\text{H}-\text{CO}]^+$<br>$\text{C}_{14}\text{H}_{11}\text{O}_3$ <b>227.0708</b> ,<br>$[\text{aglycone}+\text{H}-\text{CO}-\text{CO}]^+$<br>$\text{C}_{13}\text{H}_{11}\text{O}_2$ <b>199.0759</b> ,<br>$^{1,3}\text{A}^+ \text{C}_7\text{H}_5\text{O}_3$ <b>137.0239</b> | 290.0637     | [52] |
| genistein-acetyl-malonylglucoside | 560.1166   | $\text{C}_{26}\text{H}_{24}\text{O}_{14}$ | $[\text{aglycone}+\text{H}]^+ \text{C}_{15}\text{H}_{11}\text{O}_5$<br><b>271.0606</b> ,<br>$[\text{aglycone}+\text{H}-\text{CO}]^+$<br>$\text{C}_{14}\text{H}_{11}\text{O}_4$ <b>243.065</b> ,<br>$[\text{aglycone}+\text{H}-\text{CO}-\text{CO}]^+$<br>$\text{C}_{13}\text{H}_{11}\text{O}_3$ <b>215.0708</b> ,<br>$^{1,3}\text{A}^+ \text{C}_7\text{H}_5\text{O}_4$ <b>153.0188</b>  | 290.0637     | [52] |

$[\text{aglycone}+\text{H}]^+$ : the protonated ion of the aglycone of polyphenols.

$[\text{aglycone}-\text{H}]^-$ : the deprotonated ion of the aglycone of polyphenols.

$^{ij}\text{A}^{+/-}$ : the protonated or deprotonated fragment ion of A-ring of polyphenols, i and j represent the position of the broken bond on C-ring.

$^{ij}\text{B}^{+/-}$ : the protonated or deprotonated fragment ion of B-ring of polyphenols.

These known and novel polyphenols were structurally characterized using the manually verified characteristic fragment ions of aglycone and featured neutral loss of modification groups based on published literature.

27. Li, H.-J.; Deinzer, M.L. Tandem Mass Spectrometry for Sequencing Proanthocyanidins. *Analytical Chemistry* **2007**, *79*, 1739-1748, doi:10.1021/ac061823v.
45. Fang, S.; Qu, Q.; Zheng, Y.; Zhong, H.; Shan, C.; Wang, F.; Li, C.; Peng, G. Structural characterization and identification of flavonoid aglycones in three Glycyrrhiza species by liquid chromatography with photodiode array detection and quadrupole time-of-flight mass spectrometry. *J Sep Sci* **2016**, *39*, 2068-2078, doi:10.1002/jssc.201600073.
46. Iijima, Y.; Suda, K.; Suzuki, T.; Aoki, K.; Shibata, D. Metabolite Profiling of Chalcones and Flavanones in Tomato Fruit. *Journal of the Japanese Society for Horticultural Science* **2008**, *77*, 94-102, doi:10.2503/jjshs1.77.94.
47. Pellati, F.; Orlandini, G.; Pinetti, D.; Benvenuti, S. HPLC-DAD and HPLC-ESI-MS/MS methods for metabolite profiling of propolis extracts. *J Pharm Biomed Anal* **2011**, *55*, 934-948, doi:10.1016/j.jpba.2011.03.024.
48. Zheng, G.D.; Zhou, P.; Yang, H.; Li, Y.S.; Li, P.; Liu, E.H. Rapid resolution liquid chromatography-electrospray ionisation tandem mass spectrometry method for identification of chemical constituents in Citri Reticulatae Pericarpium. *Food Chem* **2013**, *136*, 604-611, doi:10.1016/j.foodchem.2012.08.040.
49. Abad-Garcia, B.; Garmon-Lobato, S.; Berrueta, L.A.; Gallo, B.; Vicente, F. A fragmentation study of dihydroquercetin using triple quadrupole mass spectrometry and its application for identification of dihydroflavonols in Citrus juices. *Rapid Commun Mass Spectrom* **2009**, *23*, 2785-2792, doi:10.1002/rcm.4182.
50. Ma, C.; Lv, H.; Zhang, X.; Chen, Z.; Shi, J.; Lu, M.; Lin, Z. Identification of regioisomers of methylated kaempferol and quercetin by ultra high performance liquid chromatography quadrupole time-of-flight (UHPLC-QTOF) tandem mass spectrometry combined with diagnostic fragmentation pattern analysis. *Anal Chim Acta* **2013**, *795*, 15-24, doi:10.1016/j.aca.2013.07.038.
51. Barnes, J.S.; Schug, K.A. Structural characterization of cyanidin-3,5-diglucoside and pelargonidin-3,5-diglucoside anthocyanins: Multi-dimensional fragmentation pathways using high performance liquid chromatography-electrospray ionization-ion trap-time of flight mass spectrometry. *International Journal of Mass Spectrometry* **2011**, *308*, 71-80, doi:10.1016/j.ijms.2011.07.026.

52. Nakata, R.; Yoshinaga, N.; Teraishi, M.; Okumoto, Y.; Huffaker, A.; Schmelz, E.A.; Mori, N.  
A fragmentation study of isoflavones by IT-TOF-MS using biosynthesized isotopes. *Biosci  
Biotechnol Biochem* **2018**, 82, 1309-1315, doi:10.1080/09168451.2018.1465810.
