# Supplementary material for: Metabolomic Analysis Reveals Domestication-Driven Reshaping of Polyphenolic Antioxidants in Soybean Seeds
Source: Antioxidants (Basel). 2023 Apr 11;12(4):912. doi: 10.3390/antiox12040912 (PMC10135580; doi:10.3390/antiox12040912)
Supplement: Supplementary file 1 [file antioxidants-12-00912-s001.zip]

Archive with 4 entries (4 files):
- Table S2.pdf
- Table S3.pdf
- Supplementary_Figures.pdf
- Table S1.xlsx
