# Supplementary material for: Metabolomic Analysis Reveals Domestication-Driven Reshaping of Polyphenolic Antioxidants in Soybean Seeds
Source: Antioxidants (Basel). 2023 Apr 11;12(4):912. doi: 10.3390/antiox12040912 (PMC10135580; doi:10.3390/antiox12040912)
Supplement: Supplementary file 1 [file antioxidants-12-00912-s001.zip › Table S1.xlsx]

## Sheet: Table S1
Table S1 The detailed information of domestication-related polyphenols.
Note: Fold change, the ratio of relative abundance between wild soybeans with cultivated soybeans.
VIP value, The value of variable importance in the projection (VIP) obtained from OPLS-DA model in SIMCA-P software.
The relative abundance of metabolites was log2-transformed.
Name	VIP value	Fold change	jd17-1	jd17-2	jd17-3	jind23-1	jind23-2	jind23-3	qh34-1	qh34-2	qh34-3	TSTED-1	TSTED-2	TSTED-3	wd28-1	wd28-2	wd28-3	yd22-1	yd22-2	yd22-3	w1-1	w1-2	w1-3	w11-1	w11-2	w11-3	w55-1	w55-2	w55-3	w61-1	w61-2	w61-3	w71-1	w71-2	w71-3	w92-1	w92-2	w92-3
(-)-epicatechin	3.41125	1750.02	21.7626	21.8378	21.8138	21.7777	21.7107	21.7259	23.5204	22.7872	23.6025	21.5728	21.6339	21.5551	21.6719	21.6011	21.592	21.6889	21.6425	21.5012	33.4826	33.5093	33.5071	27.5407	27.4581	27.8153	33.0339	32.9635	33.0354	33.2784	33.3023	33.3016	32.9821	32.9939	32.9493	32.89	32.908	32.8934
(+)-catechin	2.51981	280.307	20.2835	20.3252	20.3273	20.3932	20.4402	20.4199	19.9966	20.281	20.2101	20.3541	20.4399	20.3993	20.3238	20.131	20.1975	20.206	20.1276	20.1564	26.6964	26.7727	26.6742	20.8131	20.6685	21.3773	30.6852	30.4628	30.5678	27.012	27.0258	27.0368	26.8448	26.8095	26.7381	27.4352	27.4732	27.4035
catechin-glucoside	2.10572	24.0288	20.725	20.8305	20.8571	20.8651	20.9377	20.9842	20.4822	20.6976	20.5059	20.8761	20.9538	20.8795	20.7262	20.7135	20.738	20.719	20.6427	20.5455	24.7126	24.7291	24.7046	22.5941	22.7139	22.7111	25.1831	25.0561	25.0993	25.1773	25.224	25.193	26.9535	26.9688	26.903	24.231	24.1243	24.2556
(-)-epiafzelechin	1.92915	19.3445	19.9078	19.9754	20.1614	19.8887	19.8555	20.1661	19.7517	19.9854	19.8973	19.9304	19.9911	19.8137	19.8376	19.6166	19.744	19.6536	19.6831	19.6354	24.9073	24.8951	24.902	20.2301	19.9004	20.483	22.9897	22.8413	23.0221	25.0491	25.0718	25.0492	24.2142	24.0123	24.0964	24.1526	23.9612	24.0611
afzelechin-catechin	1.67597	12.4273	20.3093	20.3163	20.0944	20.1122	20.1934	20.1826	20.094	20.228	20.0531	20.3687	20.4385	20.2214	20.1536	19.747	20.0481	20.1184	20.0845	19.949	24.4685	24.5867	24.5524	20.646	20.5348	20.5551	21.5813	20.8585	21.3102	24.7059	24.7486	24.807	23.5277	23.4384	23.5889	24.2121	24.2258	23.9739
procyanidin B2	2.51198	151.771	22.2388	22.2177	22.1679	22.295	22.2676	22.2479	21.7654	21.9258	21.9908	22.163	22.0857	22.1735	22.0787	21.9996	22.0271	22.0234	22.0609	21.926	29.9214	29.8915	30.0212	22.1479	22.1281	22.059	29.3648	29.1367	29.3006	29.5227	29.5961	29.6237	29.6725	29.8148	29.6269	29.414	29.4336	29.4411
procyanidin C1	2.12377	37.5954	20.5509	20.4825	20.5369	20.2979	20.2761	20.3075	20.4205	20.3297	20.3223	20.699	20.7772	20.6828	20.1829	20.3122	20.2414	20.3137	20.2834	20.1919	26.8852	26.7435	26.9184	20.8033	20.5624	20.6752	24.8202	24.3054	24.865	25.7411	25.7978	25.9596	25.7394	25.6626	25.6909	25.4457	25.7605	25.5503
phlorizin	2.24275	39.1841	20.9304	21.3804	21.2106	20.5582	20.0912	20.2777	20.5789	20.6922	20.4154	20.591	19.8942	20.5876	20.0095	20.5164	20.6827	20.6162	20.5403	20.5555	26.9192	26.9002	26.8965	22.0177	21.7694	22.3086	25.6611	25.5545	25.6798	26.3259	26.2751	26.3691	26.3537	26.3411	26.2915	24.5925	24.5477	24.6922
taxifolin	1.87144	14.6234	20.8383	20.9105	20.8456	21.0487	20.6856	20.9115	20.6486	20.6203	20.8015	20.7483	20.6069	20.7117	20.8443	20.8395	20.8688	20.6233	20.7715	20.6265	25.4564	25.3814	25.3976	20.9791	21.06	21.1062	24.5083	24.7312	24.5774	24.5989	24.5087	24.5503	24.465	24.422	24.3985	25.2562	25.1675	25.1585
quercetin 3-O-galactoside	2.80888	207.794	21.3034	21.6473	21.5214	21.4311	21.3769	21.4214	20.3135	20.2031	20.1742	20.5409	20.4657	20.5884	20.2538	20.3323	20.2504	20.3021	20.2425	20.3422	29.1251	29.1817	29.1174	23.0182	23.0176	24.3803	28.1766	28.0292	28.2152	28.6523	28.5477	28.7012	28.9601	29.0891	28.9561	28.6271	28.7728	28.7425
cyanidin 3-O-glucoside	2.17646	462.31 (black wild soybeans / brown wild soybeans), 1227.16 (black wild soybeans / yellow cultivated soybeans)	24.8954	24.6957	24.9681	25.3817	25.3288	25.2998	24.1029	24.436	24.9115	25.3149	25.3563	25.5056	24.7503	24.9648	24.9743	24.7239	24.9132	24.9578	35.4055	35.5035	35.4471	25.589	25.6161	25.7574	26.6293	26.4257	26.5715	34.6046	34.6454	34.6633	35.603	35.5635	35.5213	27.0299	26.5782	26.8198
